# Supplementary material for: Efficient Test and Visualization of Multi-Set Intersections
Source: PubMed Central journal article supplement (PMC4658477; doi:10.1038/srep16923), 2015-11-25
Supplement: srep16923-s1.pdf [file srep16923-s1.pdf]

# Efficient Test and Visualization of Multi-Set Intersections

Minghui Wang, Yongzhong Zhao and Bin Zhang\*

Department of Genetics and Genomic Sciences, Icahn Institute of Genomics and Multiscale Biology, Icahn School of Medicine at Mount Sinai, 1470 Madison Avenue, NY 10029, USA.

\*Correspondence:

Bin Zhang, PhD.

Associate Professor

Department of Genetics & Genomic Sciences

Icahn School of Medicine at Mount Sinai

1470 Madison Avenue, Room S8-111, New York, NY 10029

(Phone) 212-824-8947 (Fax) 646-537-8660

Email: [bin.zhang@mssm.edu](mailto:bin.zhang@mssm.edu)

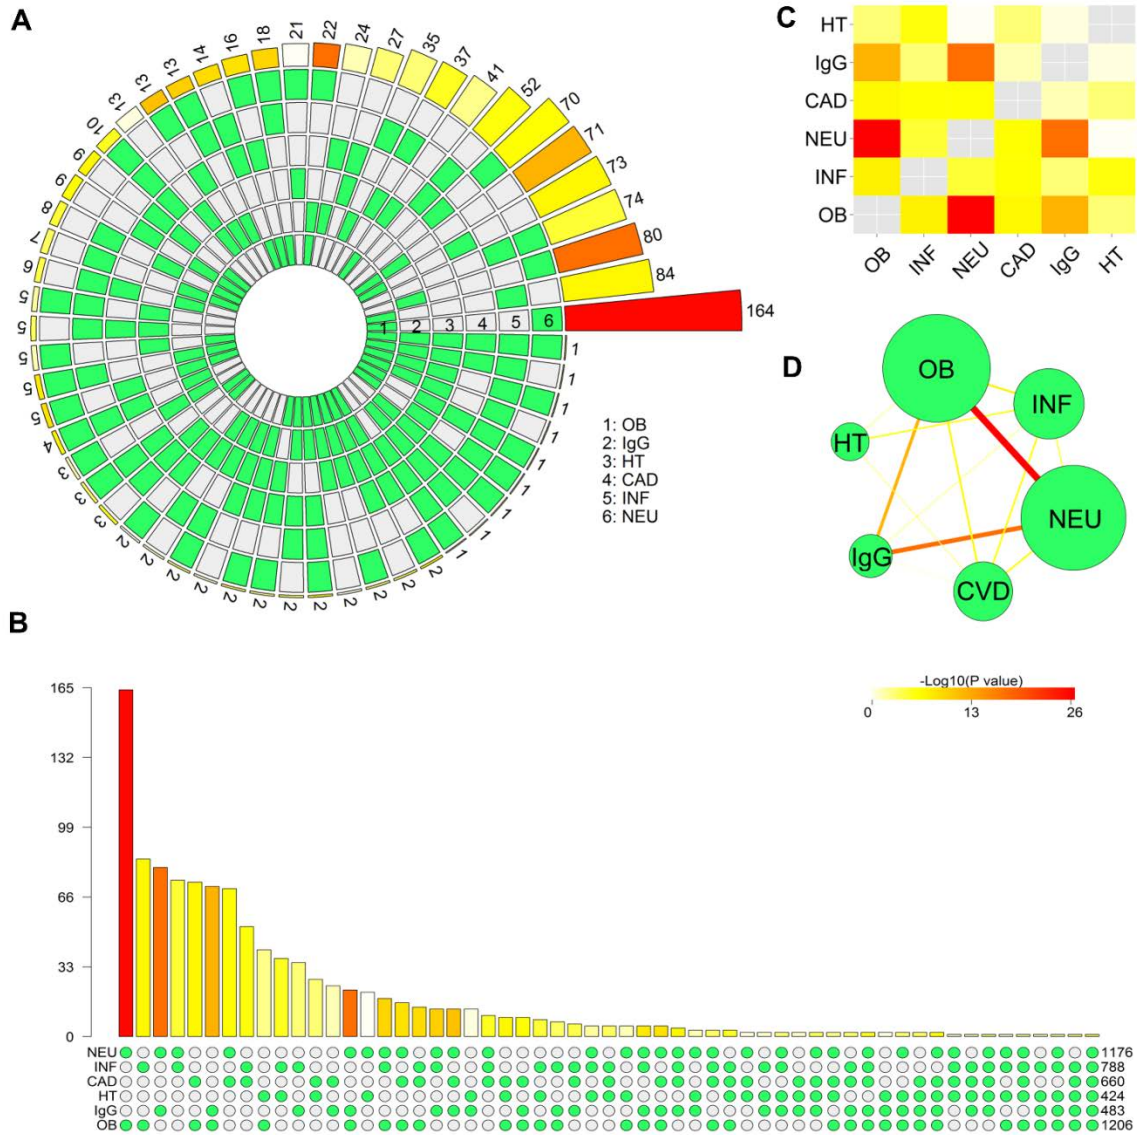

**Figure S1 | Visualization of the intersections of six GWAS gene sets.** A) and B) show all possible intersections among the six gene sets in a circular and matrix layouts, respectively. C) and D) show the pairwise intersections. The node size in D) is proportional to the gene set size. The rest of the legend is identical to that of **Figures 1-4**.

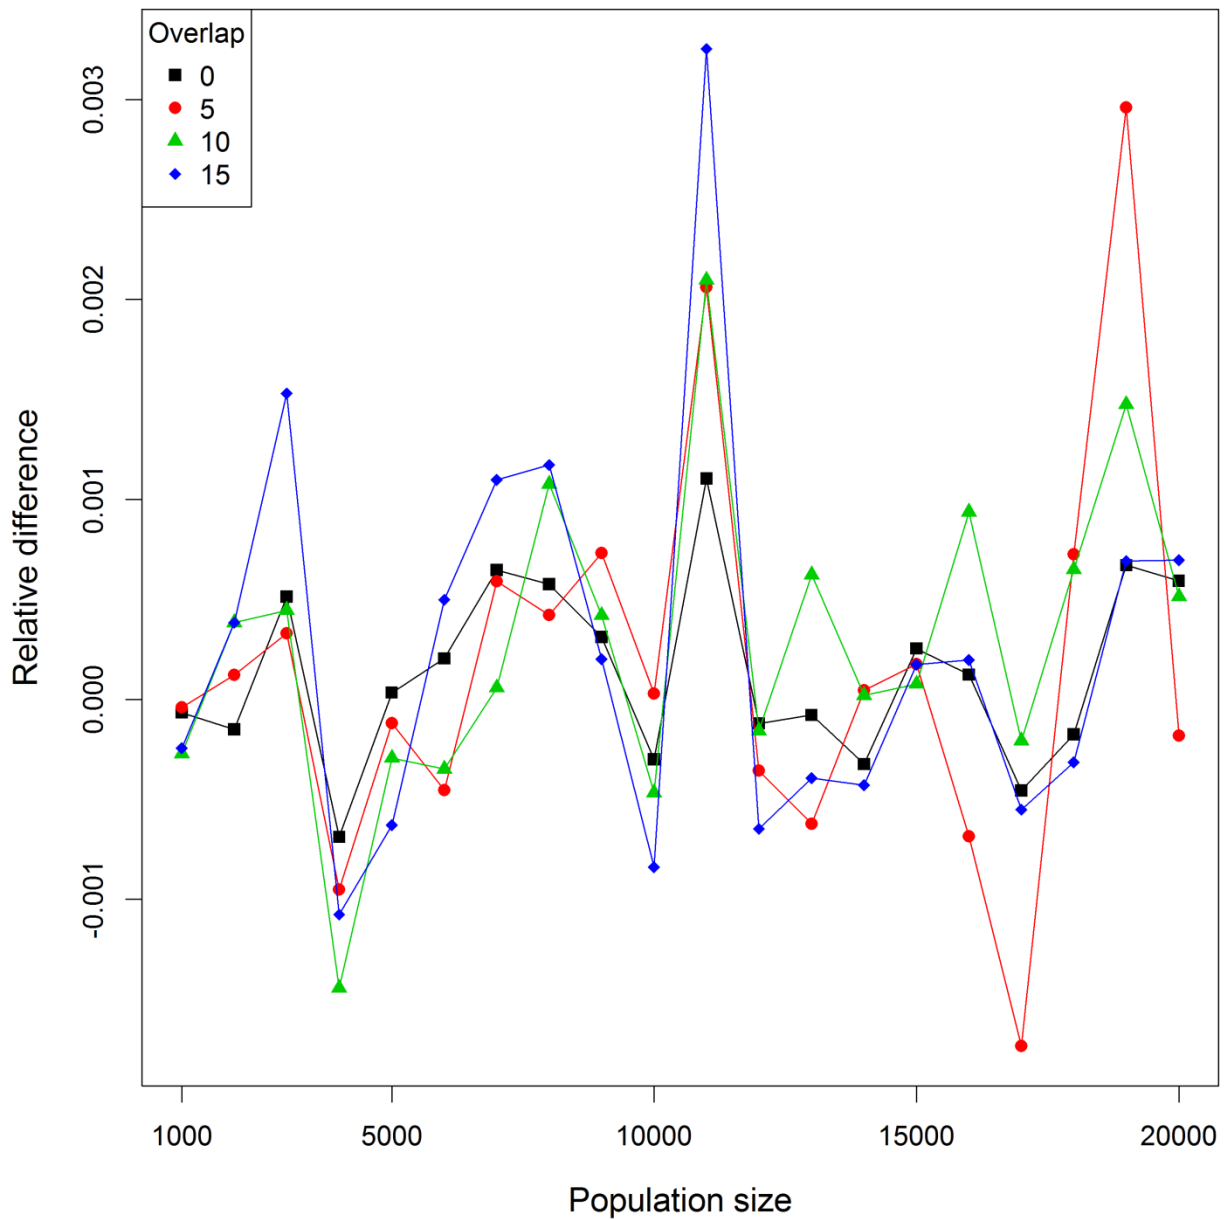

**Figure S2 | Comparing the multi-set intersection probability density values between implementations using single-precision (32-bit) and double-precision (64-bit) floating-point arithmetics in C language.** At each point, the intersection probabilities are computed for an overlap of size 0, 5, 10 and 15 among three hypothetical sets of sizes 200, 300 and 400, which are randomly sampled from a population. The y axis is the difference between the probabilities

obtained from the two arithmetics divided by the probability computed from the double-precision arithmetic.

**Table S1. Intersection analysis of cancer gene sets.**

| Intersections    | Observed<br>Intersection Size | Expected<br>Intersection Size | Fold Enrichment | P value   | Adjusted P<br>value* |
|------------------|-------------------------------|-------------------------------|-----------------|-----------|----------------------|
| NRG <sup>1</sup> | 114                           | NA                            | NA              | NA        | NA                   |
| NBG <sup>2</sup> | 435                           | NA                            | NA              | NA        | NA                   |
| LDG <sup>3</sup> | 137                           | NA                            | NA              | NA        | NA                   |
| GGG <sup>4</sup> | 260                           | NA                            | NA              | NA        | NA                   |
| ELG <sup>5</sup> | 107                           | NA                            | NA              | NA        | NA                   |
| CCG <sup>6</sup> | 522                           | NA                            | NA              | NA        | NA                   |
| BVG <sup>7</sup> | 125                           | NA                            | NA              | NA        | NA                   |
| NBG & NRG        | 41                            | 2.40                          | 17.10           | 1.10E-39  | 1.32E-37             |
| LDG & NRG        | 38                            | 0.75                          | 50.33           | 1.01E-55  | 1.21E-53             |
| LDG & NBG        | 83                            | 2.88                          | 28.81           | 3.71E-105 | 4.45E-103            |
| GGG & NRG        | 31                            | 1.43                          | 21.64           | 6.06E-33  | 7.28E-31             |
| GGG & NBG        | 120                           | 5.47                          | 21.95           | 4.91E-134 | 5.89E-132            |
| GGG & LDG        | 80                            | 1.72                          | 46.46           | 1.30E-119 | 1.56E-117            |
| ELG & NRG        | 17                            | 0.59                          | 28.83           | 1.78E-20  | 2.13E-18             |
| ELG & NBG        | 53                            | 2.25                          | 23.56           | 2.32E-60  | 2.79E-58             |
| ELG & LDG        | 52                            | 0.71                          | 73.38           | 6.97E-88  | 8.37E-86             |
| ELG & GGG        | 54                            | 1.34                          | 40.15           | 4.84E-75  | 5.81E-73             |
| CCG & NRG        | 76                            | 2.88                          | 26.42           | 1.48E-94  | 1.78E-92             |
| CCG & NBG        | 129                           | 10.98                         | 11.75           | 2.62E-103 | 3.14E-101            |
| CCG & LDG        | 119                           | 3.46                          | 34.42           | 4.31E-175 | 5.18E-173            |
| CCG & GGG        | 94                            | 6.56                          | 14.33           | 1.23E-83  | 1.48E-81             |
| CCG & ELG        | 63                            | 2.70                          | 23.33           | 4.12E-73  | 4.94E-71             |
| BVG & NRG        | 38                            | 0.69                          | 55.17           | 1.76E-57  | 2.11E-55             |
| BVG & NBG        | 78                            | 2.63                          | 29.68           | 3.18E-100 | 3.82E-98             |
| BVG & LDG        | 119                           | 0.83                          | 143.75          | 1.39E-285 | 1.67E-283            |
| BVG & GGG        | 76                            | 1.57                          | 48.38           | 2.13E-115 | 2.56E-113            |
| BVG & ELG        | 48                            | 0.65                          | 74.24           | 5.52E-81  | 6.62E-79             |
| BVG & CCG        | 110                           | 3.15                          | 34.87           | 6.19E-163 | 7.42E-161            |
| LDG & NBG & NRG  | 25                            | 0.02                          | 1574.78         | 1.92E-73  | 2.30E-71             |
| GGG & NBG & NRG  | 26                            | 0.03                          | 862.98          | 4.15E-69  | 4.98E-67             |
| GGG & LDG & NRG  | 25                            | 0.01                          | 2634.73         | 3.05E-79  | 3.66E-77             |
| GGG & LDG & NBG  | 69                            | 0.04                          | 1905.73         | 3.13E-214 | 3.76E-212            |
| ELG & NBG & NRG  | 13                            | 0.01                          | 1048.48         | 5.04E-36  | 6.05E-34             |
| ELG & LDG & NRG  | 14                            | 0.00                          | 3585.20         | 1.99E-46  | 2.39E-44             |
| ELG & LDG & NBG  | 43                            | 0.01                          | 2885.82         | 1.89E-140 | 2.27E-138            |
| ELG & GGG & NRG  | 13                            | 0.01                          | 1754.19         | 5.55E-39  | 6.66E-37             |
| ELG & GGG & NBG  | 48                            | 0.03                          | 1697.42         | 9.43E-145 | 1.13E-142            |
| ELG & GGG & LDG  | 44                            | 0.01                          | 4940.49         | 6.97E-155 | 8.36E-153            |
| CCG & NBG & NRG  | 35                            | 0.06                          | 578.63          | 5.00E-87  | 6.01E-85             |
| CCG & LDG & NRG  | 36                            | 0.02                          | 1889.74         | 1.26E-109 | 1.51E-107            |
| CCG & LDG & NBG  | 73                            | 0.07                          | 1004.24         | 7.51E-205 | 9.02E-203            |
| CCG & GGG & NRG  | 26                            | 0.04                          | 719.15          | 5.38E-67  | 6.46E-65             |

|                       |     |      |           |           |           |
|-----------------------|-----|------|-----------|-----------|-----------|
| CCG & GGG & NBG       | 73  | 0.14 | 529.16    | 4.85E-179 | 5.82E-177 |
| CCG & GGG & LDG       | 73  | 0.04 | 1680.17   | 3.03E-223 | 3.63E-221 |
| CCG & ELG & NRG       | 15  | 0.01 | 1008.15   | 3.30E-41  | 3.96E-39  |
| CCG & ELG & NBG       | 43  | 0.06 | 757.39    | 4.90E-113 | 5.88E-111 |
| CCG & ELG & LDG       | 47  | 0.02 | 2628.56   | 2.85E-152 | 3.42E-150 |
| CCG & ELG & GGG       | 45  | 0.03 | 1326.11   | 3.16E-130 | 3.79E-128 |
| BVG & NBG & NRG       | 25  | 0.01 | 1725.96   | 1.52E-74  | 1.83E-72  |
| BVG & LDG & NRG       | 38  | 0.00 | 8329.97   | 1.34E-142 | 1.61E-140 |
| BVG & LDG & NBG       | 78  | 0.02 | 4480.95   | 7.09E-282 | 8.51E-280 |
| BVG & GGG & NRG       | 25  | 0.01 | 2887.67   | 2.42E-80  | 2.91E-78  |
| BVG & GGG & NBG       | 66  | 0.03 | 1997.87   | 1.42E-206 | 1.71E-204 |
| BVG & GGG & LDG       | 76  | 0.01 | 7304.74   | 3.79E-292 | 4.54E-290 |
| BVG & ELG & NRG       | 14  | 0.00 | 3929.38   | 5.16E-47  | 6.19E-45  |
| BVG & ELG & NBG       | 41  | 0.01 | 3015.75   | 1.15E-134 | 1.38E-132 |
| BVG & ELG & LDG       | 47  | 0.00 | 10976.87  | 7.48E-185 | 8.98E-183 |
| BVG & ELG & GGG       | 42  | 0.01 | 5168.65   | 1.34E-148 | 1.61E-146 |
| BVG & CCG & NRG       | 36  | 0.02 | 2071.15   | 2.70E-111 | 3.23E-109 |
| BVG & CCG & NBG       | 69  | 0.07 | 1040.34   | 5.87E-195 | 7.04E-193 |
| BVG & CCG & LDG       | 105 | 0.02 | 5026.70   | 0         | 0.00E+00  |
| BVG & CCG & GGG       | 69  | 0.04 | 1740.57   | 3.23E-212 | 3.88E-210 |
| BVG & CCG & ELG       | 43  | 0.02 | 2635.72   | 5.95E-139 | 7.14E-137 |
| GGG & LDG & NBG & NRG | 21  | 0.00 | 105250.41 | 3.00E-100 | 3.60E-98  |
| ELG & LDG & NBG & NRG | 11  | 0.00 | 133963.59 | 6.01E-54  | 7.22E-52  |
| ELG & GGG & NBG & NRG | 11  | 0.00 | 70588.51  | 8.43E-51  | 1.01E-48  |
| ELG & GGG & LDG & NRG | 12  | 0.00 | 244506.97 | 5.61E-62  | 6.73E-60  |
| ELG & GGG & LDG & NBG | 40  | 0.00 | 213592.30 | 2.87E-206 | 3.45E-204 |
| CCG & LDG & NBG & NRG | 24  | 0.00 | 59912.66  | 1.30E-108 | 1.56E-106 |
| CCG & GGG & NBG & NRG | 21  | 0.00 | 27623.19  | 1.59E-87  | 1.91E-85  |
| CCG & GGG & LDG & NRG | 24  | 0.00 | 100238.49 | 3.58E-114 | 4.30E-112 |
| CCG & GGG & LDG & NBG | 62  | 0.00 | 67862.61  | 8.96E-289 | 1.08E-286 |
| CCG & ELG & NBG & NRG | 11  | 0.00 | 35159.03  | 2.01E-47  | 2.41E-45  |
| CCG & ELG & LDG & NRG | 13  | 0.00 | 131933.84 | 1.47E-63  | 1.77E-61  |
| CCG & ELG & LDG & NBG | 38  | 0.00 | 101067.62 | 1.36E-182 | 1.63E-180 |
| CCG & ELG & GGG & NRG | 11  | 0.00 | 58823.76  | 6.40E-50  | 7.68E-48  |
| CCG & ELG & GGG & NBG | 40  | 0.00 | 56057.75  | 6.05E-181 | 7.26E-179 |
| CCG & ELG & GGG & LDG | 40  | 0.00 | 177993.58 | 5.79E-203 | 6.95E-201 |
| BVG & LDG & NBG & NRG | 25  | 0.00 | 260620.07 | 5.07E-130 | 6.08E-128 |
| BVG & GGG & NBG & NRG | 21  | 0.00 | 115354.45 | 3.71E-101 | 4.45E-99  |
| BVG & GGG & LDG & NRG | 25  | 0.00 | 436037.43 | 8.03E-136 | 9.64E-134 |
| BVG & GGG & LDG & NBG | 66  | 0.00 | 301677.76 | 0         | 0.00E+00  |
| BVG & ELG & NBG & NRG | 11  | 0.00 | 146824.09 | 2.11E-54  | 2.53E-52  |
| BVG & ELG & LDG & NRG | 14  | 0.00 | 593336.92 | 8.15E-78  | 9.78E-76  |
| BVG & ELG & LDG & NBG | 41  | 0.00 | 455378.78 | 6.92E-227 | 8.30E-225 |
| BVG & ELG & GGG & NRG | 12  | 0.00 | 267979.64 | 1.78E-62  | 2.13E-60  |
| BVG & ELG & GGG & NBG | 38  | 0.00 | 222392.30 | 1.64E-196 | 1.97E-194 |
| BVG & ELG & GGG & LDG | 42  | 0.00 | 780466.25 | 3.74E-243 | 4.49E-241 |
| BVG & CCG & NBG & NRG | 24  | 0.00 | 65664.28  | 1.15E-109 | 1.39E-107 |

|                                         |    |      |               |           |           |
|-----------------------------------------|----|------|---------------|-----------|-----------|
| BVG & CCG & LDG & NRG                   | 36 | 0.00 | 312744.09     | 6.42E-192 | 7.71E-190 |
| BVG & CCG & LDG & NBG                   | 69 | 0.00 | 157091.00     | 0         | 0.00E+00  |
| BVG & CCG & GGG & NRG                   | 24 | 0.00 | 109861.38     | 3.18E-115 | 3.82E-113 |
| BVG & CCG & GGG & NBG                   | 59 | 0.00 | 70778.51      | 5.65E-276 | 6.79E-274 |
| BVG & CCG & GGG & LDG                   | 69 | 0.00 | 262825.32     | 0         | 0.00E+00  |
| BVG & CCG & ELG & NRG                   | 13 | 0.00 | 144599.49     | 4.22E-64  | 5.07E-62  |
| BVG & CCG & ELG & NBG                   | 36 | 0.00 | 104940.10     | 1.69E-173 | 2.03E-171 |
| BVG & CCG & ELG & LDG                   | 42 | 0.00 | 388737.98     | 1.18E-229 | 1.42E-227 |
| BVG & CCG & ELG & GGG                   | 38 | 0.00 | 185326.92     | 2.23E-193 | 2.68E-191 |
| ELG & GGG & LDG & NBG & NRG             | 10 | 0.00 | 9689876.83    | 8.89E-68  | 1.07E-65  |
| CCG & GGG & LDG & NBG & NRG             | 20 | 0.00 | 3972478.24    | 3.88E-127 | 4.66E-125 |
| CCG & ELG & LDG & NBG & NRG             | 10 | 0.00 | 4826375.43    | 1.03E-64  | 1.24E-62  |
| CCG & ELG & GGG & NBG & NRG             | 9  | 0.00 | 2288815.73    | 2.38E-55  | 2.86E-53  |
| CCG & ELG & GGG & LDG & NRG             | 11 | 0.00 | 8882387.09    | 4.57E-74  | 5.48E-72  |
| CCG & ELG & GGG & LDG & NBG             | 36 | 0.00 | 7618247.99    | 2.40E-241 | 2.88E-239 |
| BVG & GGG & LDG & NBG & NRG             | 21 | 0.00 | 17418522.59   | 1.30E-147 | 1.56E-145 |
| BVG & ELG & LDG & NBG & NRG             | 11 | 0.00 | 22170438.19   | 1.50E-78  | 1.80E-76  |
| BVG & ELG & GGG & NBG & NRG             | 10 | 0.00 | 10620105.01   | 3.44E-68  | 4.12E-66  |
| BVG & ELG & GGG & LDG & NRG             | 12 | 0.00 | 40464925.64   | 7.73E-89  | 9.28E-87  |
| BVG & ELG & GGG & LDG & NBG             | 38 | 0.00 | 33581237.14   | 9.21E-282 | 1.11E-279 |
| BVG & CCG & LDG & NBG & NRG             | 24 | 0.00 | 9915305.69    | 6.97E-163 | 8.36E-161 |
| BVG & CCG & GGG & NBG & NRG             | 20 | 0.00 | 4353836.15    | 5.35E-128 | 6.42E-126 |
| BVG & CCG & GGG & LDG & NRG             | 24 | 0.00 | 16589069.13   | 1.92E-168 | 2.31E-166 |
| BVG & CCG & GGG & LDG & NBG             | 59 | 0.00 | 10687555.46   | 0         | 0.00E+00  |
| BVG & CCG & ELG & NBG & NRG             | 10 | 0.00 | 5289707.47    | 4.00E-65  | 4.79E-63  |
| BVG & CCG & ELG & LDG & NRG             | 13 | 0.00 | 21834522.46   | 1.11E-92  | 1.33E-90  |
| BVG & CCG & ELG & LDG & NBG             | 36 | 0.00 | 15845955.82   | 4.00E-254 | 4.80E-252 |
| BVG & CCG & ELG & GGG & NRG             | 11 | 0.00 | 9735096.26    | 1.60E-74  | 1.92E-72  |
| BVG & CCG & ELG & GGG & NBG             | 34 | 0.00 | 7885733.14    | 2.57E-228 | 3.09E-226 |
| BVG & CCG & ELG & GGG & LDG             | 38 | 0.00 | 27984364.29   | 1.25E-278 | 1.50E-276 |
| CCG & ELG & GGG & LDG & NBG & NRG       | 9  | 0.00 | 345611175.84  | 4.47E-75  | 5.37E-73  |
| BVG & ELG & GGG & LDG & NBG & NRG       | 10 | 0.00 | 1603635855.91 | 3.99E-90  | 4.79E-88  |
| BVG & CCG & GGG & LDG & NBG & NRG       | 20 | 0.00 | 657429258.94  | 3.31E-172 | 3.97E-170 |
| BVG & CCG & ELG & LDG & NBG & NRG       | 10 | 0.00 | 798745828.61  | 4.64E-87  | 5.57E-85  |
| BVG & CCG & ELG & GGG & NBG & NRG       | 9  | 0.00 | 378789848.72  | 1.91E-75  | 2.29E-73  |
| BVG & CCG & ELG & GGG & LDG & NRG       | 11 | 0.00 | 1469999534.59 | 1.14E-98  | 1.37E-96  |
| BVG & CCG & ELG & GGG & LDG & NBG       | 34 | 0.00 | 1190745704.50 | 2.47E-304 | 2.97E-302 |
| BVG & CCG & ELG & GGG & LDG & NBG & NRG | 9  | 0.00 | #####         | 3.58E-95  | 4.30E-93  |

1, NRG (Rahman, N. Realizing the promise of cancer predisposition genes. Nature 2014, 505:302-308)

2, NBG (Tamborero, D. et al. Comprehensive identification of mutational cancer driver genes across 12 tumor types. Scientific reports 2013, 3:2650).

3, LDG (Kandoth, C. et al. Mutational landscape and significance across 12 major cancer types. Nature 2013, 502:333-339)

4, GGG (Lawrence, M. S. et al. Discovery and saturation analysis of cancer genes across 21 tumour types. Nature 2014, 505:495-501)

5, ELG (Garraway, L. A. & Lander, E. S. Lessons from the cancer genome. Cell 2013, 153:17-37)

6, CCG (Futreal, P. A. et al. A census of human cancer genes. Nature reviews. Cancer 2004, 4:177-183)

7, BVG (Vogelstein, B. et al. Cancer genome landscapes. Science 2013, 339:1546-1558)

\*Bonferroni corrected P value









**Table S2. Intersection analysis of GWAS gene sets.**

| Intersections         | Observed<br>Intersection Size | Expected<br>Intersection Size | Fold Enrichment | P value  | Adjusted P<br>value* |
|-----------------------|-------------------------------|-------------------------------|-----------------|----------|----------------------|
| NEU <sup>1</sup>      | 1176                          | NA                            | NA              | NA       | NA                   |
| INF <sup>2</sup>      | 788                           | NA                            | NA              | NA       | NA                   |
| CVD <sup>3</sup>      | 660                           | NA                            | NA              | NA       | NA                   |
| HT <sup>4</sup>       | 424                           | NA                            | NA              | NA       | NA                   |
| IgG <sup>5</sup>      | 483                           | NA                            | NA              | NA       | NA                   |
| OB <sup>6</sup>       | 1206                          | NA                            | NA              | NA       | NA                   |
| INF & NEU             | 74                            | 44.80                         | 1.65            | 1.48E-05 | 8.43E-04             |
| CVD & NEU             | 70                            | 37.52                         | 1.87            | 3.59E-07 | 2.05E-05             |
| CVD & INF             | 52                            | 25.14                         | 2.07            | 6.39E-07 | 3.64E-05             |
| HT & NEU              | 21                            | 24.10                         | 0.87            | 0.77     | 1.00                 |
| HT & INF              | 37                            | 16.15                         | 2.29            | 2.68E-06 | 1.53E-04             |
| HT & CVD              | 27                            | 13.53                         | 2.00            | 5.61E-04 | 0.03                 |
| IgG & NEU             | 80                            | 27.46                         | 2.91            | 3.81E-18 | 2.17E-16             |
| IgG & INF             | 35                            | 18.40                         | 1.90            | 2.25E-04 | 0.01                 |
| IgG & CVD             | 24                            | 15.41                         | 1.56            | 0.02     | 1.00                 |
| IgG & HT              | 13                            | 9.90                          | 1.31            | 0.19     | 1.00                 |
| OB & NEU              | 164                           | 68.56                         | 2.39            | 2.15E-26 | 1.22E-24             |
| OB & INF              | 84                            | 45.94                         | 1.83            | 5.76E-08 | 3.28E-06             |
| OB & CVD              | 73                            | 38.48                         | 1.90            | 1.02E-07 | 5.84E-06             |
| OB & HT               | 41                            | 24.72                         | 1.66            | 1.05E-03 | 0.06                 |
| OB & IgG              | 71                            | 28.16                         | 2.52            | 5.25E-13 | 2.99E-11             |
| CVD & INF & NEU       | 10                            | 1.43                          | 7.00            | 2.39E-06 | 1.36E-04             |
| HT & INF & NEU        | 5                             | 0.92                          | 5.45            | 2.48E-03 | 0.14                 |
| HT & CVD & NEU        | 2                             | 0.77                          | 2.60            | 0.18     | 1.00                 |
| HT & CVD & INF        | 5                             | 0.52                          | 9.70            | 1.90E-04 | 1.08E-02             |
| IgG & INF & NEU       | 13                            | 1.05                          | 12.43           | 8.32E-11 | 4.74E-09             |
| IgG & CVD & NEU       | 13                            | 0.88                          | 14.84           | 9.48E-12 | 5.40E-10             |
| IgG & CVD & INF       | 6                             | 0.59                          | 10.22           | 3.25E-05 | 1.85E-03             |
| IgG & HT & NEU        | 3                             | 0.56                          | 5.33            | 0.02     | 1.00                 |
| IgG & HT & INF        | 2                             | 0.38                          | 5.30            | 0.06     | 1.00                 |
| IgG & HT & CVD        | 2                             | 0.32                          | 6.33            | 0.04     | 1.00                 |
| OB & INF & NEU        | 18                            | 2.61                          | 6.89            | 3.07E-10 | 1.75E-08             |
| OB & CVD & NEU        | 16                            | 2.19                          | 7.32            | 1.27E-09 | 7.27E-08             |
| OB & CVD & INF        | 14                            | 1.47                          | 9.55            | 4.78E-10 | 2.72E-08             |
| OB & HT & NEU         | 5                             | 1.41                          | 3.56            | 0.01     | 0.81                 |
| OB & HT & INF         | 8                             | 0.94                          | 8.50            | 6.06E-06 | 3.45E-04             |
| OB & HT & CVD         | 9                             | 0.79                          | 11.41           | 1.39E-07 | 7.95E-06             |
| OB & IgG & NEU        | 22                            | 1.60                          | 13.74           | 2.88E-18 | 1.64E-16             |
| OB & IgG & INF        | 7                             | 1.07                          | 6.53            | 1.20E-04 | 6.85E-03             |
| OB & IgG & CVD        | 9                             | 0.90                          | 10.02           | 4.14E-07 | 2.36E-05             |
| OB & IgG & HT         | 2                             | 0.58                          | 3.47            | 0.11     | 1.00                 |
| HT & CVD & INF & NEU  | 1                             | 0.03                          | 34.14           | 0.03     | 1.00                 |
| IgG & CVD & INF & NEU | 4                             | 0.03                          | 119.87          | 4.87E-08 | 2.77E-06             |

|                                 |   |          |          |          |          |
|---------------------------------|---|----------|----------|----------|----------|
| IgG & HT & INF & NEU            | 2 | 0.02     | 93.30    | 2.25E-04 | 0.01     |
| IgG & HT & CVD & NEU            | 2 | 0.02     | 111.39   | 1.58E-04 | 9.02E-03 |
| IgG & HT & CVD & INF            | 1 | 0.01     | 83.12    | 0.01     | 0.68     |
| OB & CVD & INF & NEU            | 3 | 0.08     | 36.01    | 8.95E-05 | 5.10E-03 |
| OB & HT & INF & NEU             | 1 | 0.05     | 18.68    | 0.05     | 1.00     |
| OB & HT & CVD & NEU             | 2 | 0.04     | 44.61    | 9.70E-04 | 5.53E-02 |
| OB & HT & CVD & INF             | 3 | 0.03     | 99.87    | 4.34E-06 | 2.48E-04 |
| OB & IgG & INF & NEU            | 5 | 0.06     | 82.00    | 6.36E-09 | 3.63E-07 |
| OB & IgG & CVD & NEU            | 5 | 0.05     | 97.91    | 2.64E-09 | 1.50E-07 |
| OB & IgG & CVD & INF            | 2 | 0.03     | 58.45    | 5.69E-04 | 0.03     |
| OB & IgG & HT & NEU             | 2 | 0.03     | 60.96    | 5.24E-04 | 0.03     |
| OB & IgG & HT & INF             | 1 | 0.02     | 45.49    | 0.02     | 1.00     |
| OB & IgG & HT & CVD             | 2 | 0.02     | 108.62   | 1.66E-04 | 9.48E-03 |
| IgG & HT & CVD & INF & NEU      | 1 | 6.84E-04 | 1462.18  | 6.84E-04 | 0.04     |
| OB & HT & CVD & INF & NEU       | 1 | 1.71E-03 | 585.60   | 1.71E-03 | 9.73E-02 |
| OB & IgG & CVD & INF & NEU      | 2 | 1.95E-03 | 1028.13  | 1.88E-06 | 1.07E-04 |
| OB & IgG & HT & INF & NEU       | 1 | 1.25E-03 | 800.20   | 1.25E-03 | 0.07     |
| OB & IgG & HT & CVD & NEU       | 2 | 1.05E-03 | 1910.77  | 5.43E-07 | 3.10E-05 |
| OB & IgG & HT & CVD & INF       | 1 | 7.01E-04 | 1425.80  | 7.01E-04 | 0.04     |
| OB & IgG & HT & CVD & INF & NEU | 1 | 3.99E-05 | 25081.29 | 3.99E-05 | 2.27E-03 |

1, NEU (Bipolar disorder and schizophrenia, Schizophrenia, Major depressive disorder, Alzheimer's disease, Parkinson's disease, Cognitive performance, Bipolar disorder);

2, INF (Crohn's disease, Ulcerative colitis, Inflammatory bowel disease, Rheumatoid arthritis, Multiple sclerosis, Systemic lupus erythematosus);

3, CVD (Type 2 diabetes, Coronary heart disease, Blood pressure, total Cholesterol, HDL cholesterol, Triglycerides);

4, HT (height);

5, IgG (IgG glycosylation);

6, OB (obesity, obesity related traits);

\*Bonferroni corrected P value
